# Supplementary material for: Brief communication: A first hydrological investigation of extreme August 2023 floods in Slovenia, Europe
Source: Copernicus journal article supplement (doi:10.5194/egusphere-2023-1979), 2023-09-05
Supplement: Supplementary file 1 [file egusphere-2023-1979-supplement.pdf]

# Supplement to brief communication: A first hydrological investigation of extreme August 2023 floods in Slovenia, Europe

Nejc Bezak<sup>1</sup>, Panos Panagos<sup>2</sup>, Leonidas Liakos<sup>2</sup>, Matjaž Mikoš<sup>1</sup>

<sup>1</sup>University of Ljubljana, Faculty of Civil and Geodetic Engineering, Ljubljana, Slovenia

5 <sup>2</sup>European Commission, Joint Research Centre (JRC), Ispra, Italy

Correspondence to: Nejc Bezak (nejc.bezak@fgg.uni-lj.si)

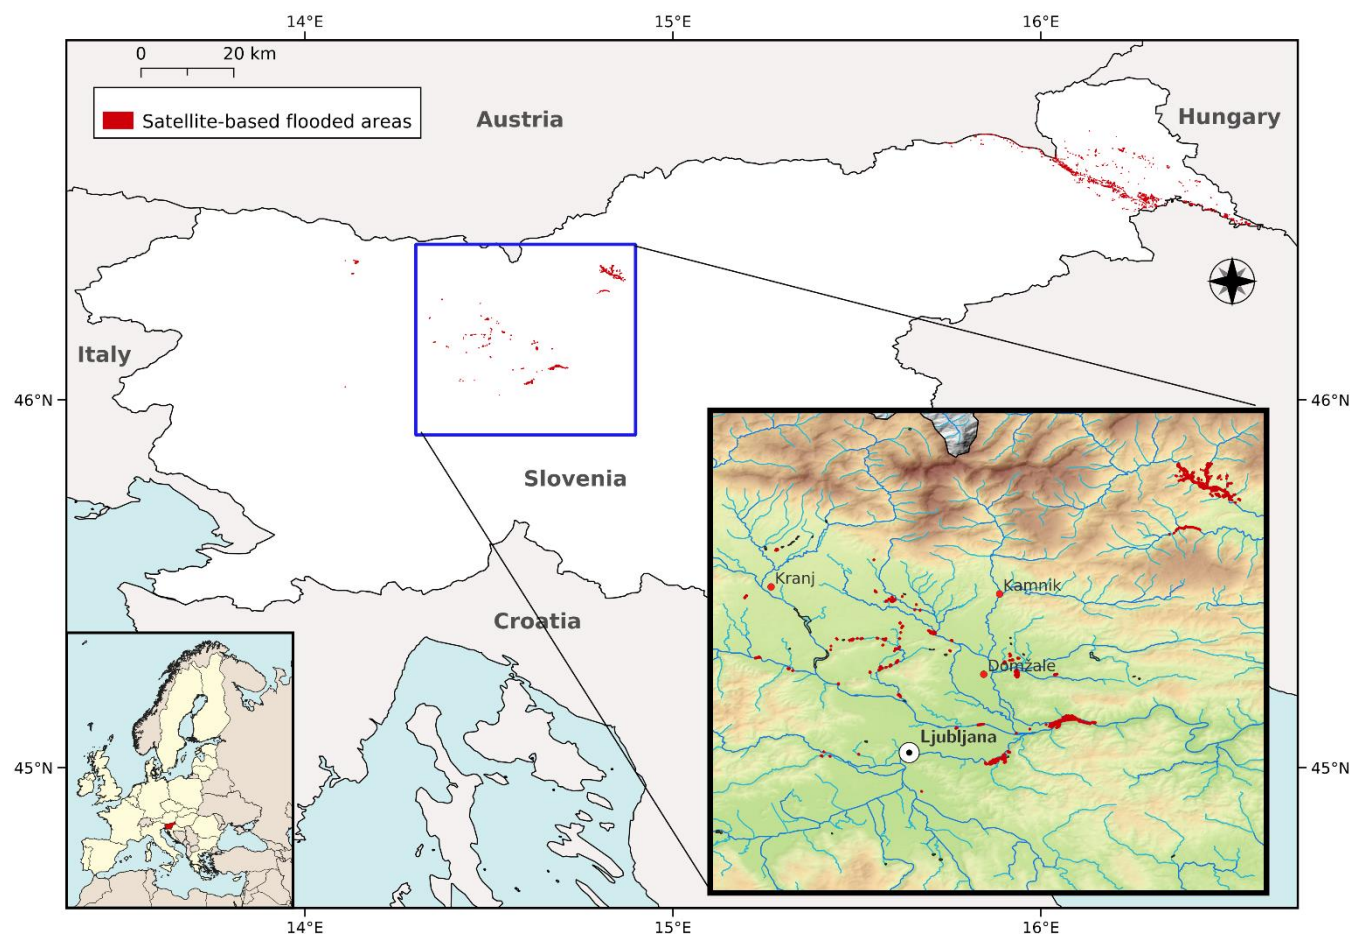

Figure S1: Location of flooded areas according to the satellite-based data (Copernicus Emergency Management Service, 2023). It should be noted that the affected areas are highly underestimated due to remote sensing limitations and that not all areas could be covered.

10

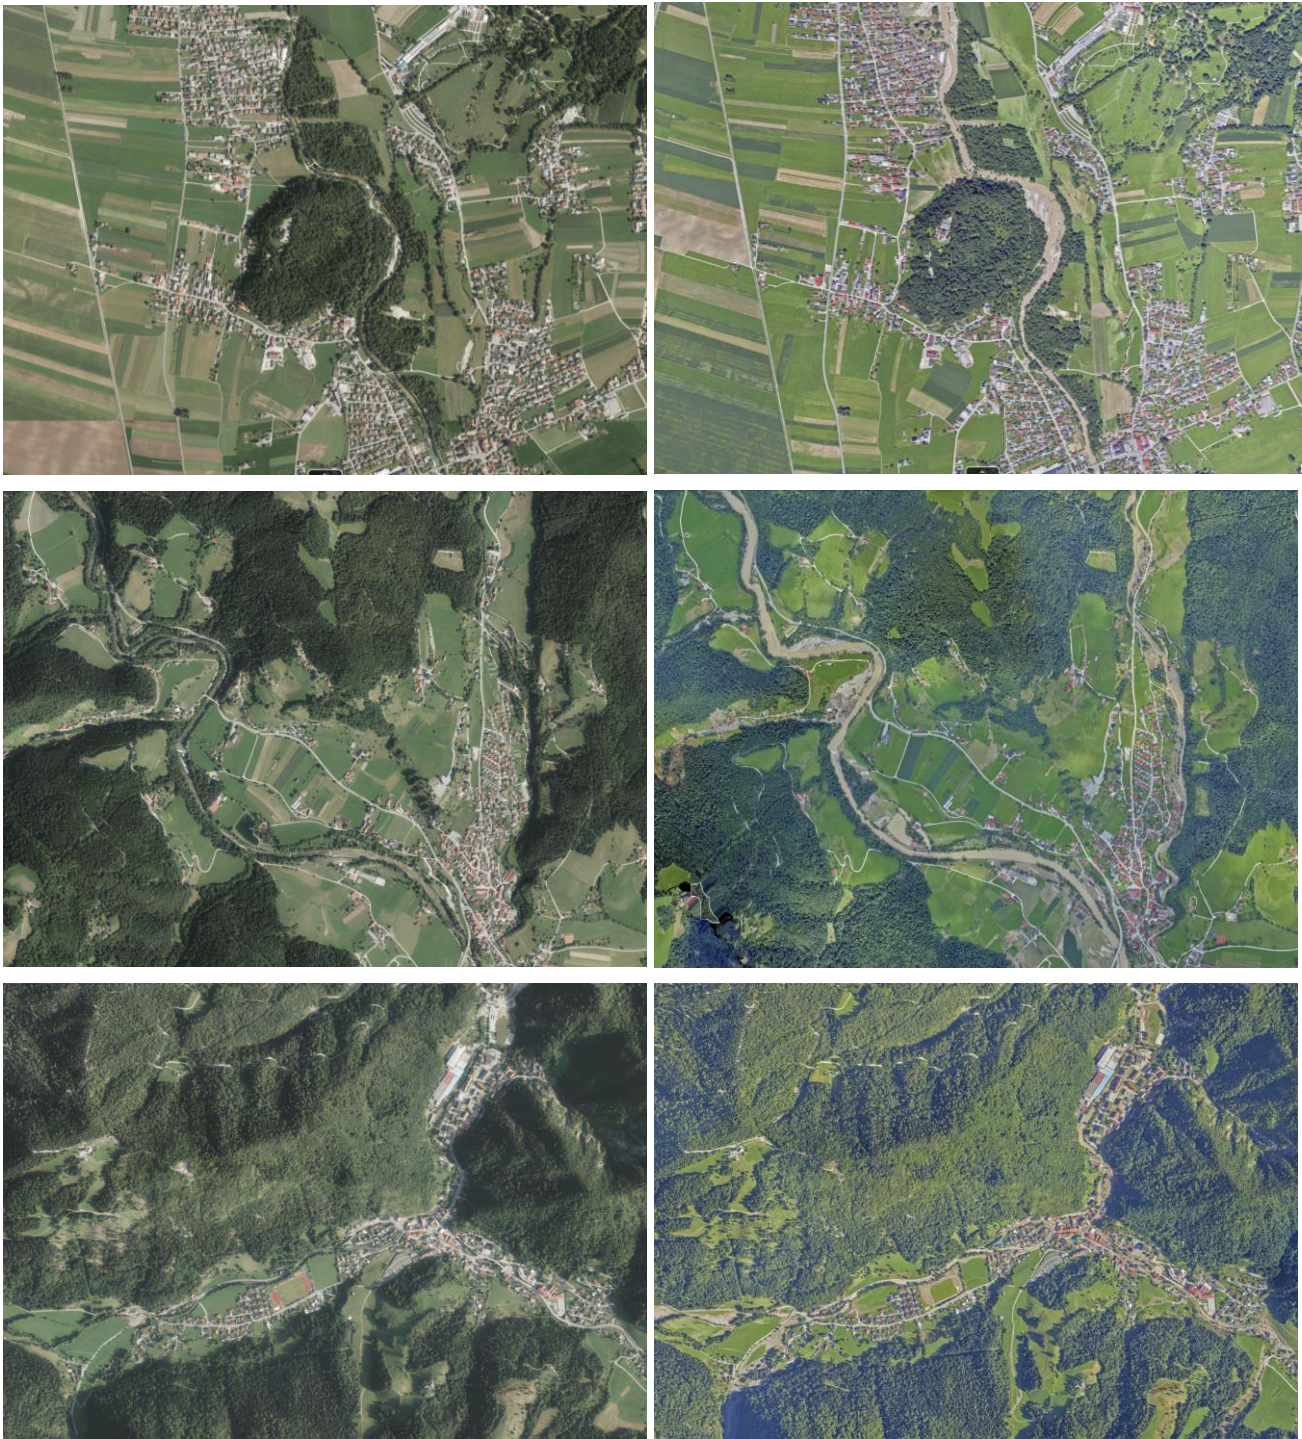

15 **Figure S2: Morphological changes in the river corridors based on the orthophoto images before (i.e., in year 2022) and after the August 2023 flood events (orthophoto survey was conducted on the 7<sup>th</sup> and 8<sup>th</sup> of August 2023). Scale of orthophoto images is 1:8000. Upper panel shows Kamniška Bistrica River near the settlement Homec, middle panel shows Savinja River and its tributaries near**

20 the settlement Ljubno ob Savinji and lower panel shows Meža River and its tributaries near the settlement Črna na Koroškem. Left figures show situation in year 2022 and right figures show situation after flood event. Source of orthophoto images is <https://poplave2023.evode.si/>.
